# Supplementary material for: Liposome leakage and increased cellular permeability induced by guanidine-based oligomers: effects of liposome composition on liposome leakage and human lung epithelial barrier permeability
Source: Royal Society of Chemistry journal article supplement (doi:10.1039/d1ra05478c), 2021-01-01
Supplement: d1ra05478c1.pdf [file d1ra05478c1.pdf]

## Supplementary Information

1

2

3

4 Liposome leakage and increased cellular  
5 permeability caused by guanidine-based oligomers:  
6 Effects of liposome composition on liposome  
7 leakage and human lung epithelial barrier  
8 permeability

9 Yeonjeong Ha<sup>1</sup>, Yerim Koo<sup>1</sup>, Seon-Kyung Park<sup>1</sup>, Ga-Eun Kim<sup>2</sup>, Han Bin Oh<sup>3</sup>, Ha Ryong

10 Kim<sup>2,\*</sup>, Jung-Hwan Kwon<sup>1,\*</sup>

11 <sup>1</sup>Division of Environmental Science and Ecological Engineering, Korea University, 145 Anam-  
12 ro, Seongbuk-gu, Seoul 02841, Republic of Korea

13 <sup>2</sup>College of Pharmacy, Daegu Catholic University, 13-13 Hayang-ro, Hayang-eup, Gyeongsan  
14 38430, Republic of Korea

15 <sup>3</sup>Department of Chemistry, Sogang University, 35 Baekbeom-ro, Mapo-gu, Seoul 04107,  
16 Republic of Korea

17

18

19 **\*Corresponding Author**

20 Ha Ryong Kim (E-mail: [kimhr@cu.ac.kr](mailto:kimhr@cu.ac.kr))

21 Jung-Hwan Kwon (E-mail: [junghwankwon@korea.ac.kr](mailto:junghwankwon@korea.ac.kr))

22

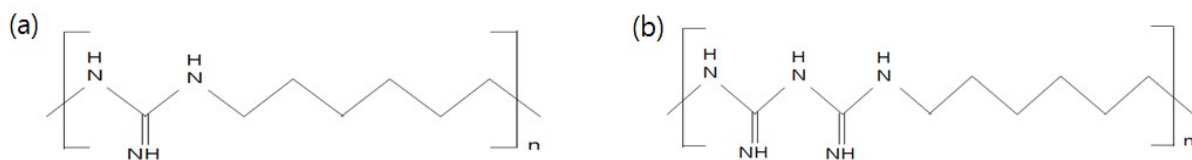

23

24 **Figure S1.** Representative molecular structures of (a) PHMG and (b) PHMB

25

26

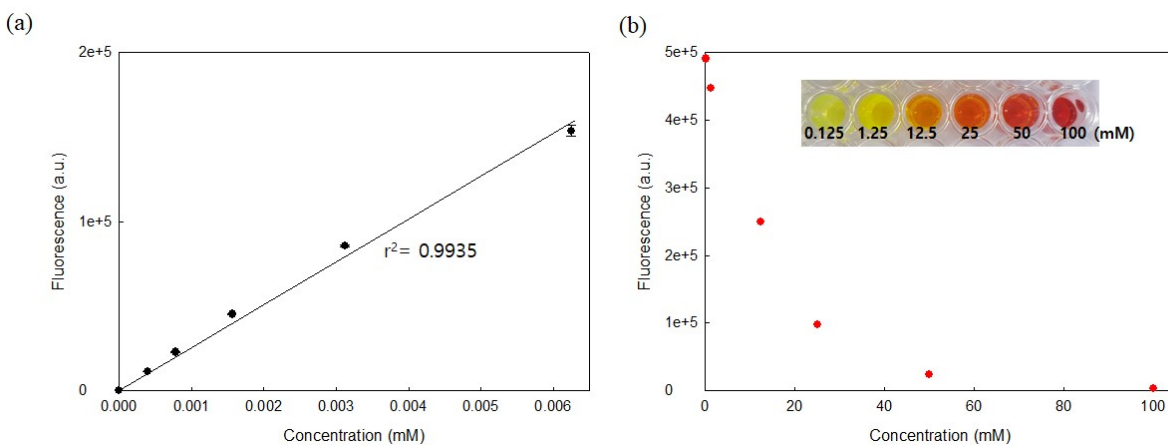

27

28 **Figure S2.** Fluorescence intensity of (a) low concentration (0 – 0.00625 mM) and (b) high concentration (0.125 -  
 29 100 mM) of 5(6)-carboxyfluorescein at pH ~7.4. Insert in Figure S1(b) shows the self-quenching of 5(6)-  
 30 carboxyfluorescein at high concentrations.

31

32

33

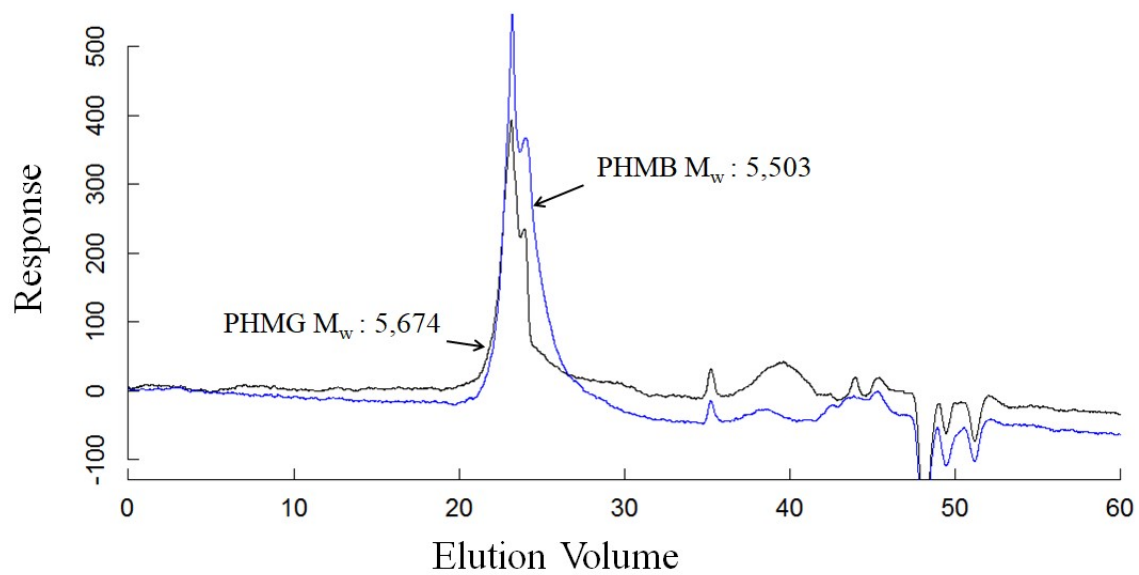

34

35 **Figure S3.** GPC spectrum of PHMG (1,000 mg L<sup>-1</sup>) and PHMB (1,000 mg L<sup>-1</sup>). The weight-average molecular  
36 mass ( $M_w$ ) of PHMG and PHMB based on the first peak was 5,674 Da and 5,503 Da, respectively.

37

38

39

40

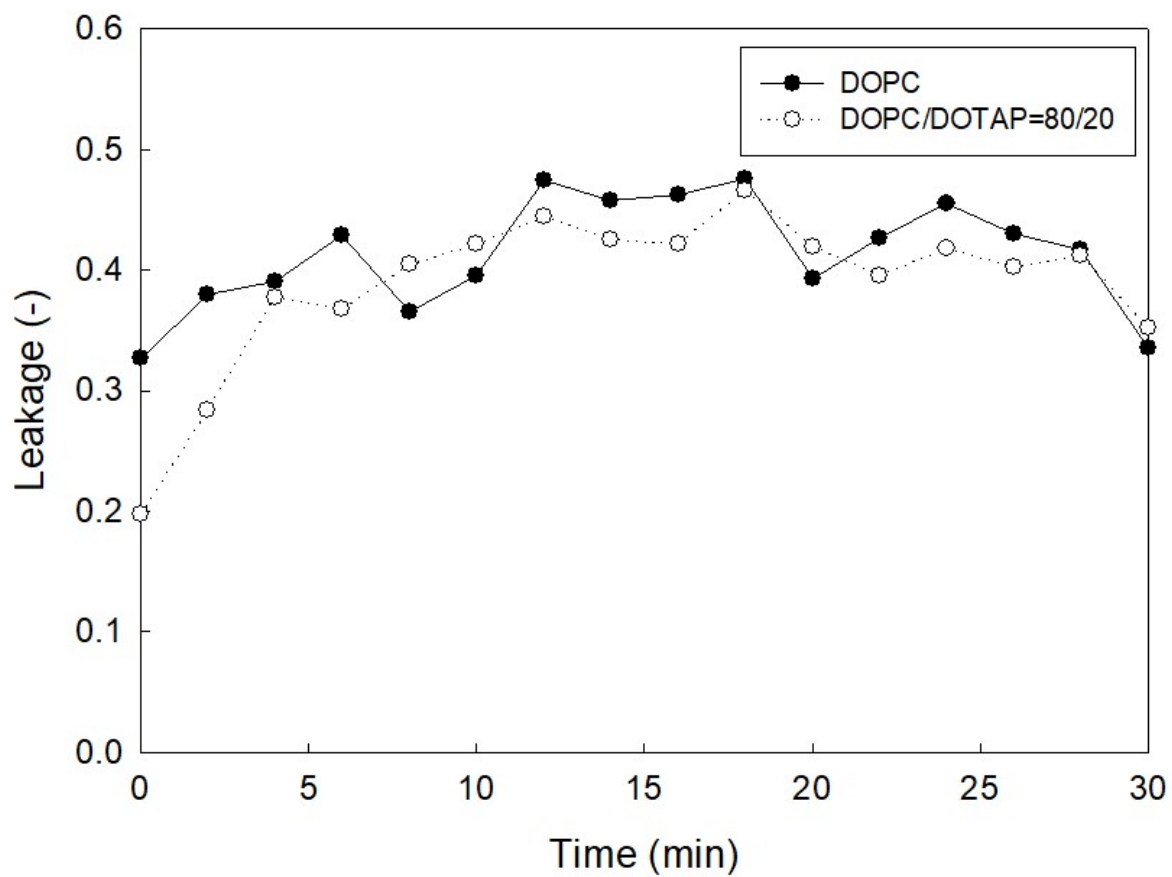

41

42 **Figure S4.** 5(6)-Carboxyfluorescein leakage of the DOPC and DOPC/DOTAP (80/20) liposomes by 23 mg L<sup>-1</sup>  
43 PHMG, polyhexamethylene guanidine.

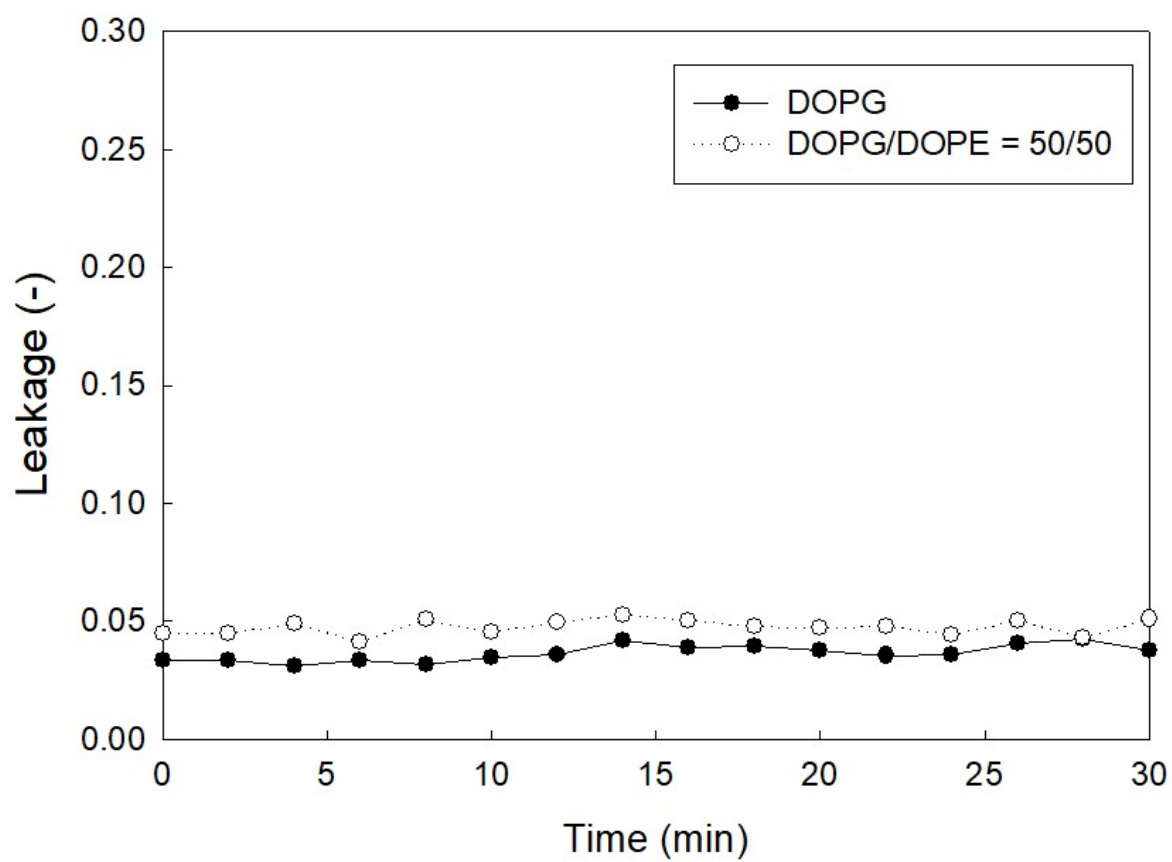

44

45 **Figure S5.** 5(6)-Carboxyfluorescein leakage of the DOPG and DOPG/DOPE (50/50) liposomes by 23 mg L<sup>-1</sup>  
46 PHMG, polyhexamethylene guanidine.

47
